# Supplementary material for: Impact of Targeted Deletion of the Circadian Clock Gene Bmal1 in Excitatory Forebrain Neurons on Adult Neurogenesis and Olfactory Function
Source: PubMed Central journal article supplement (PMC7073072; doi:10.3390/ijms21041394), 2020-02-19
Supplement: ijms-21-01394-s001.pdf [file ijms-21-01394-s001.pdf]

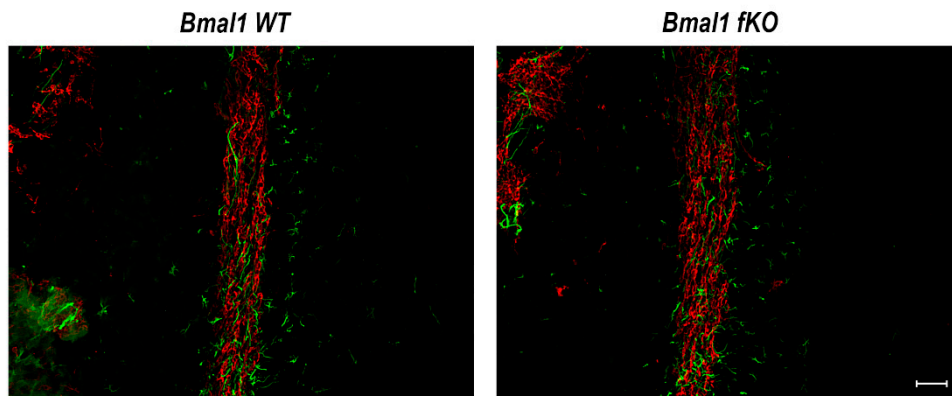

Figure S1

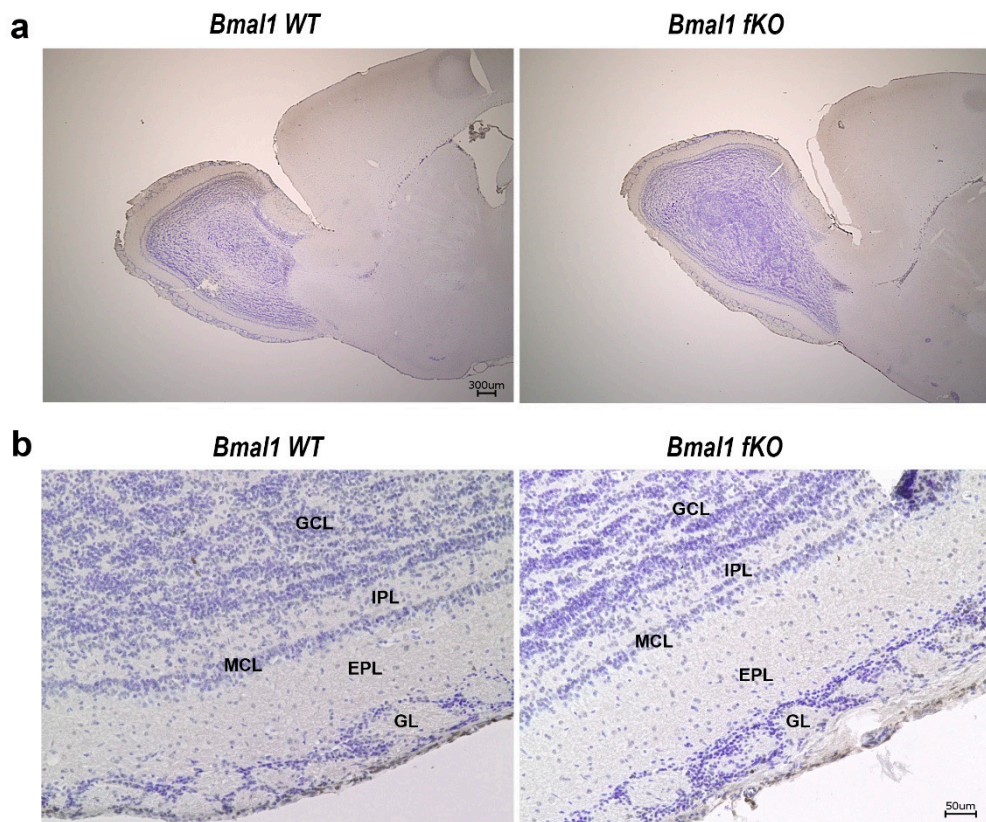

Figure S2

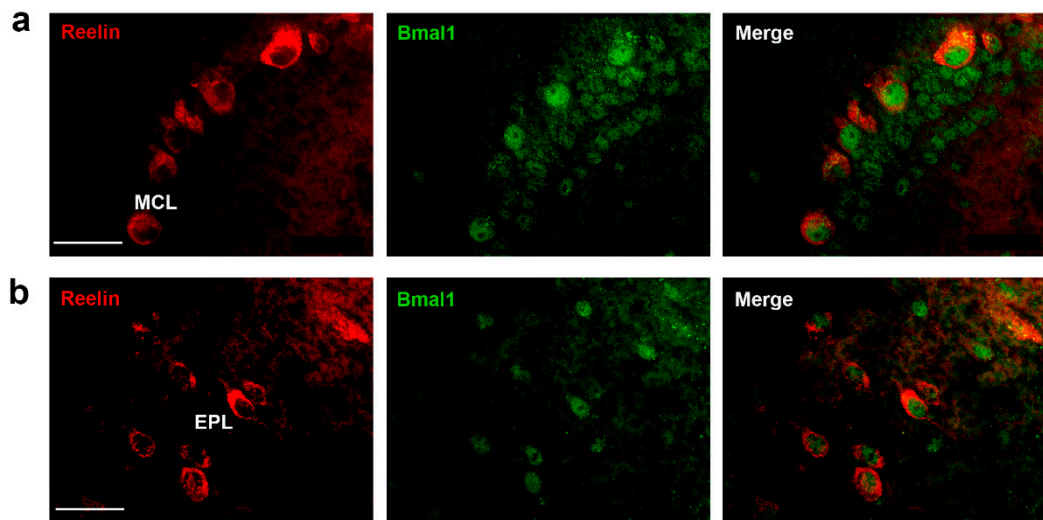

Figure S3

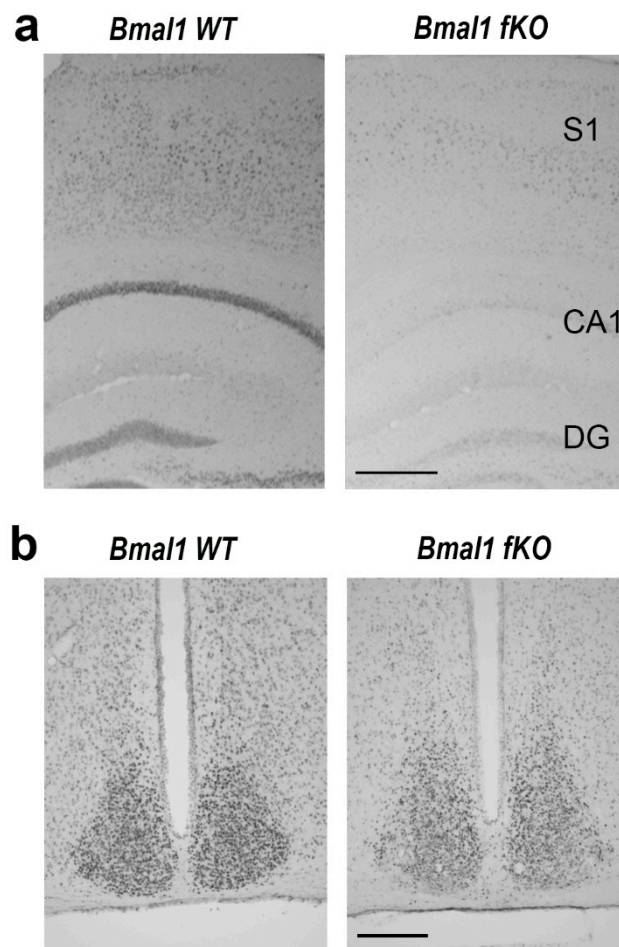

Figure S4

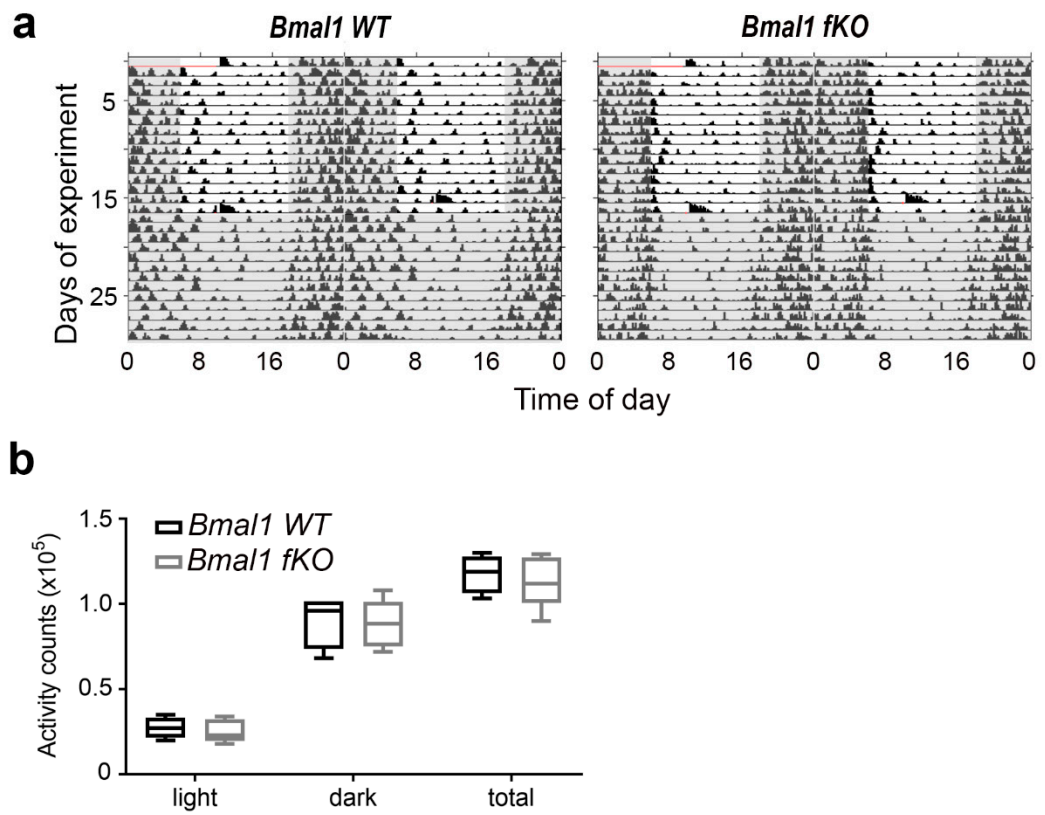

Figure S5
